# Supplementary material for: Graphene oxide wrapped gold nanorods for enhanced photo-thermal stability
Source: Royal Society of Chemistry journal article supplement (doi:10.1039/c5ra08333h), 2015-01-01
Supplement: c5ra08333h1.pdf [file c5ra08333h1.pdf]

## Supplementary Information

### Graphene Oxide Wrapped Gold Nanorods for Enhanced Photothermal Stability

Qingli Wei, Hong Ni, Xue Jin and Jing Yuan<sup>a\*</sup>

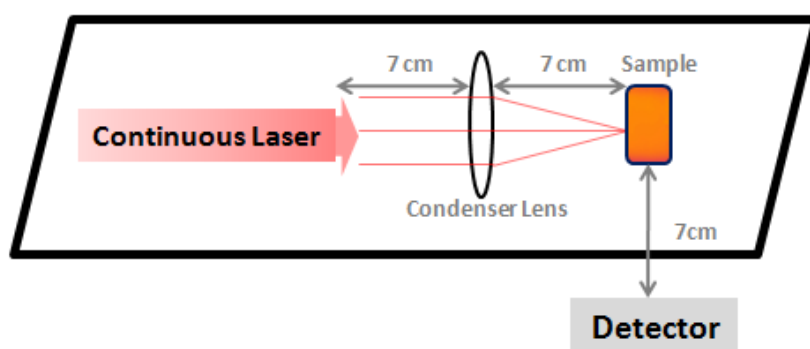

Schematic of the photothermal imaging system

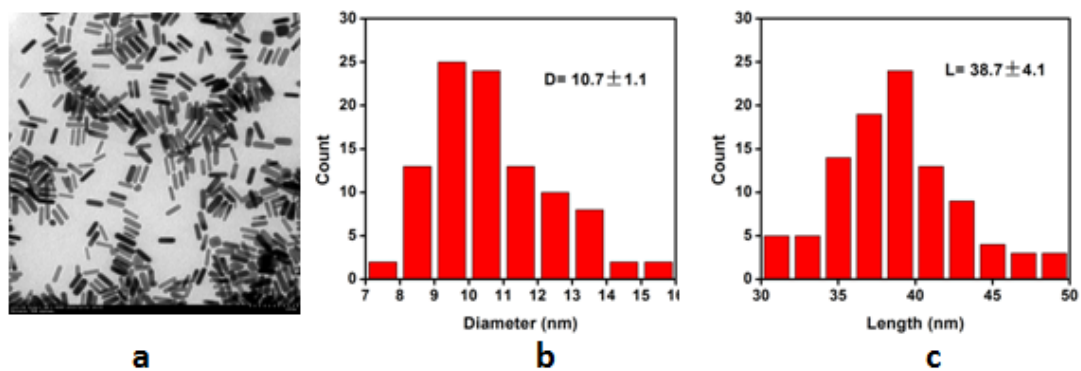

Figure S1. Statistical analysis of the diameter (b) and length (c) distribution of gold nanorods measured from TEM image (a).

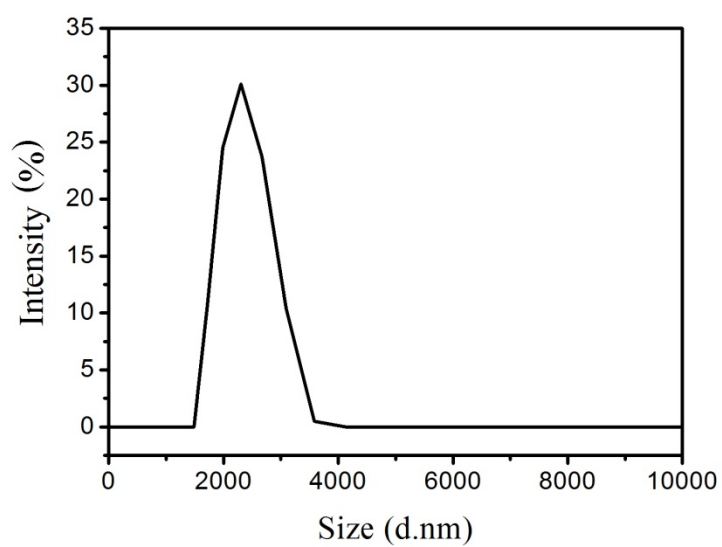

Figure S2. Size distribution of graphene oxide sheets in ammonium hydroxide solution (28 %, w/w) before ultrasonication.
